# Supplementary material for: Temperature-Dependent Optical Properties of Oxidized Graphenes
Source: MDPI journal article supplement (doi:10.3390/nano13152263), 2023-08-07
Supplement: s1 [file s1]

# Temperature-Dependent Optical Properties of Oxidized Graphenes

**Talia Tene** <sup>1,\*</sup>, **Paola G. Vinueza-Naranjo** <sup>2</sup>, **Yesenia Cevallos** <sup>2,3</sup>, **Fabian Arias Arias** <sup>4</sup>,  
**Matteo La Pietra** <sup>5,6</sup>, **Andrea Scarcello** <sup>7,8</sup>, **Yolenny Cruz Salazar** <sup>7,8</sup>, **Melvin Arias Polanco** <sup>9</sup>,  
**Salvatore Straface** <sup>10</sup>, **Cristian Vacacela Gomez** <sup>5,\*</sup>, **Lorenzo S. Caputi** <sup>7,8</sup> and **Stefano Bellucci** <sup>5,\*</sup>

Department of Chemistry, Universidad Técnica Particular de Loja, Loja 110160, Ecuador

<sup>2</sup> College of Engineering, Universidad Nacional de Chimborazo, Riobamba 060108, Ecuador; paolag.vinueza@unach.edu.ec (P.G.V.-N.); ycevallos@unach.edu.ec (Y.C.)

<sup>3</sup> Diego de Robles y Vía Interoceánica, Universidad San Francisco de Quito, Quito 170901, Ecuador

<sup>4</sup> Facultad de Ciencias, Escuela Superior Politécnica de Chimborazo (ESPOCH), Riobamba 060155, Ecuador; fabian.arias@epoch.edu.ec

<sup>5</sup> INFN—Laboratori Nazionali di Frascati, 00044 Frascati, Italy; matteo.lapietra@lnf.infn.it

<sup>6</sup> Department of Information Engineering, Polytechnic University of Marche, 60131 Ancona, Italy

<sup>7</sup> UNICARIBE Research Center, University of Calabria, 87036 Rende, Italy; andrea.scarcello@unical.it (A.S.); yolennymabelcruz@gmail.com (Y.C.S.); lorenzo.caputi@fis.unical.it (L.S.C.)

<sup>8</sup> Surface Nanoscience Group, Department of Physics, University of Calabria, Via P. Bucci, Cubo 33C, 87036 Rende, Italy

<sup>9</sup> Instituto Tecnológico de Santo Domingo, Área de Ciencias Básicas y Ambientales, Av. Los Próceres, Santo Domingo 10602, Dominican Republic; melvin.arias@intec.edu.do

<sup>10</sup> Department of Environmental Engineering (DIAM), University of Calabria, Via P. Bucci, Cubo 42B, 87036 Rende, Italy; salvatore.straface@unical.it

\* Correspondence: tbtene@utpl.edu.ec (T.T.); cristianisaac.vacacelagomez@fis.unical.it (C.V.G.); bellucci@lnf.infn.it (S.B.)

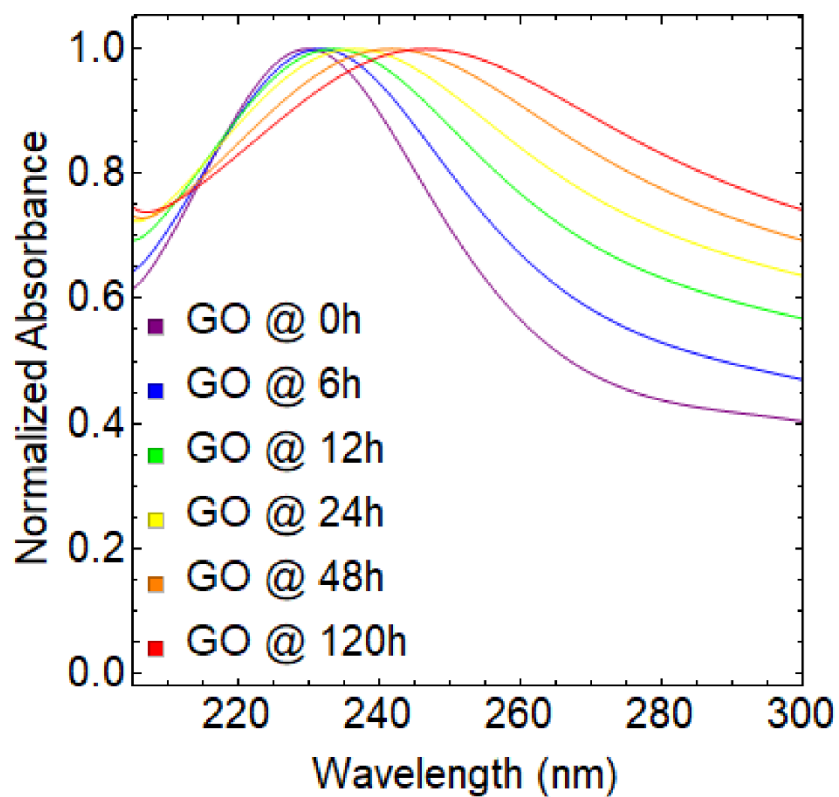

**Figure S1.** Absorbance spectra from 200 to 300 nm of GO dried at 80 °C and considering different drying times.

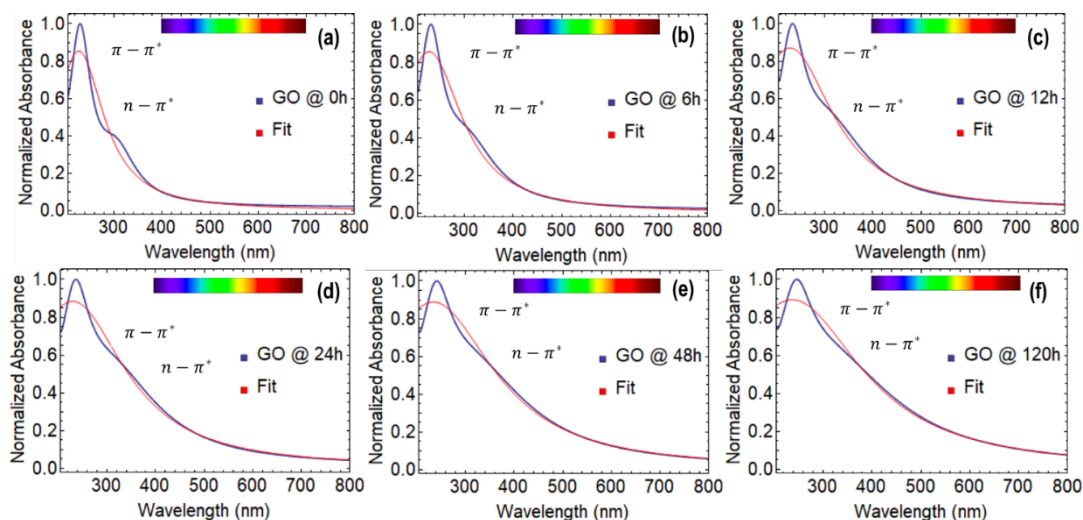

**Figure S2.** Absorbance spectrum of GO at 80 °C considering different drying times: (a) 0h, (b) 6h, (c) 12 h, (d) 24h, (e) 48, and (f) 120h.

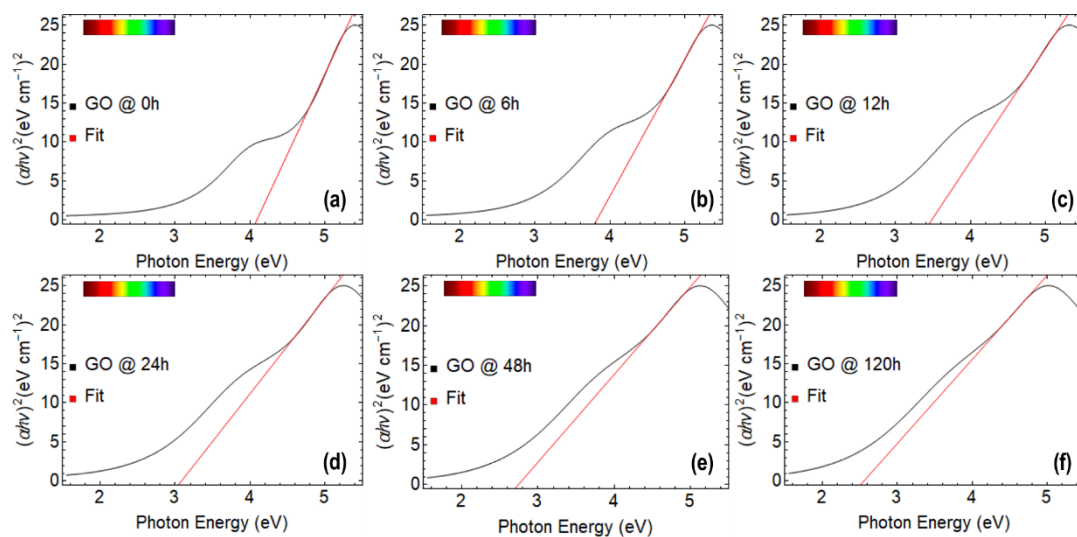

**Figure S3.** Tauc plot of GO at 80 °C considering different drying times: (a) 0h, (b) 6h, (c) 12 h, (d) 24h, (e) 48, and (f) 120h.

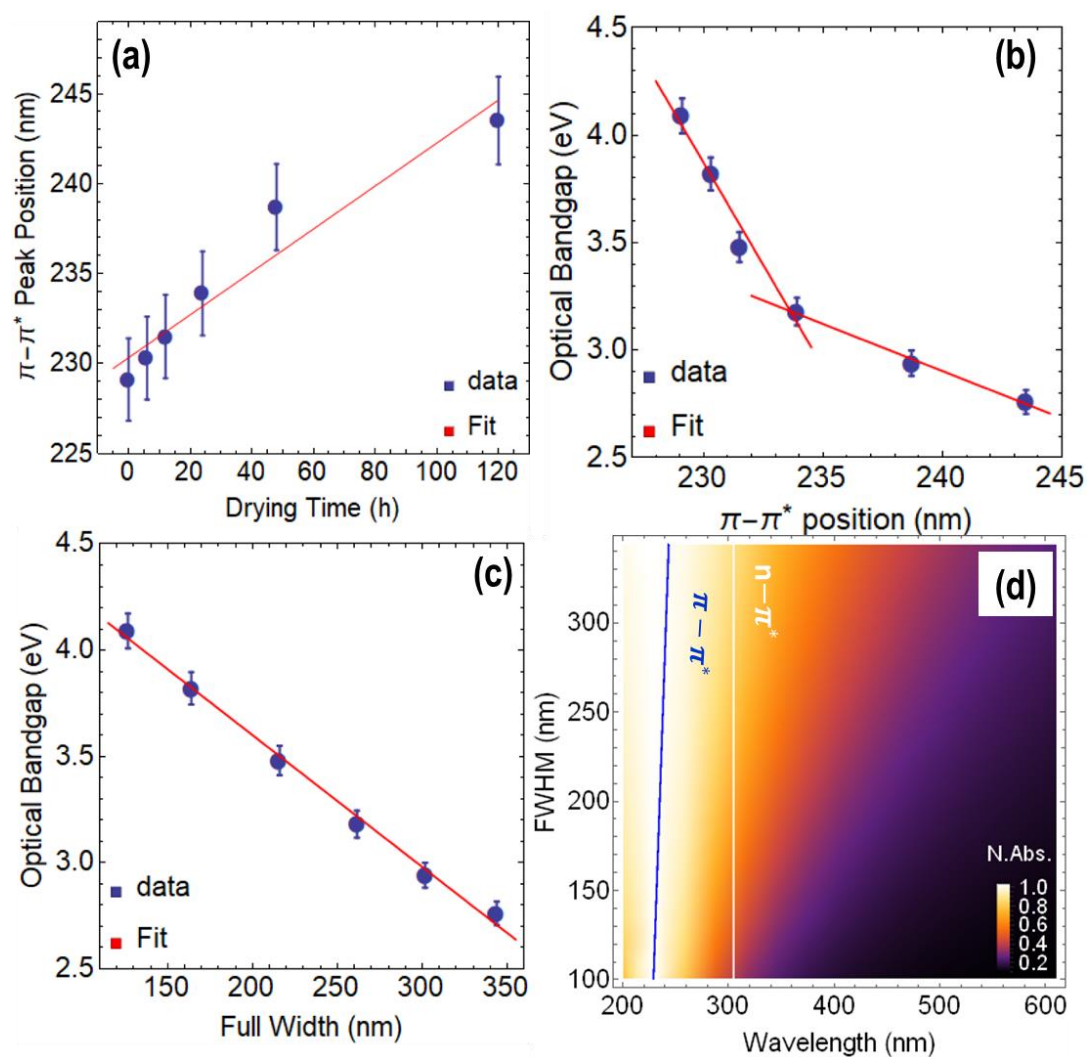

**Figure S4.** GO dried at 80 °C. (a) Position of  $\pi - \pi^*$  transition as a function of drying time. Optical bandgap as a function of: (b) position of  $\pi - \pi^*$  transition and (c) full-width at half maximum (FWHM). (d) Normalized absorbance as a function of FWHM vs. wavelength

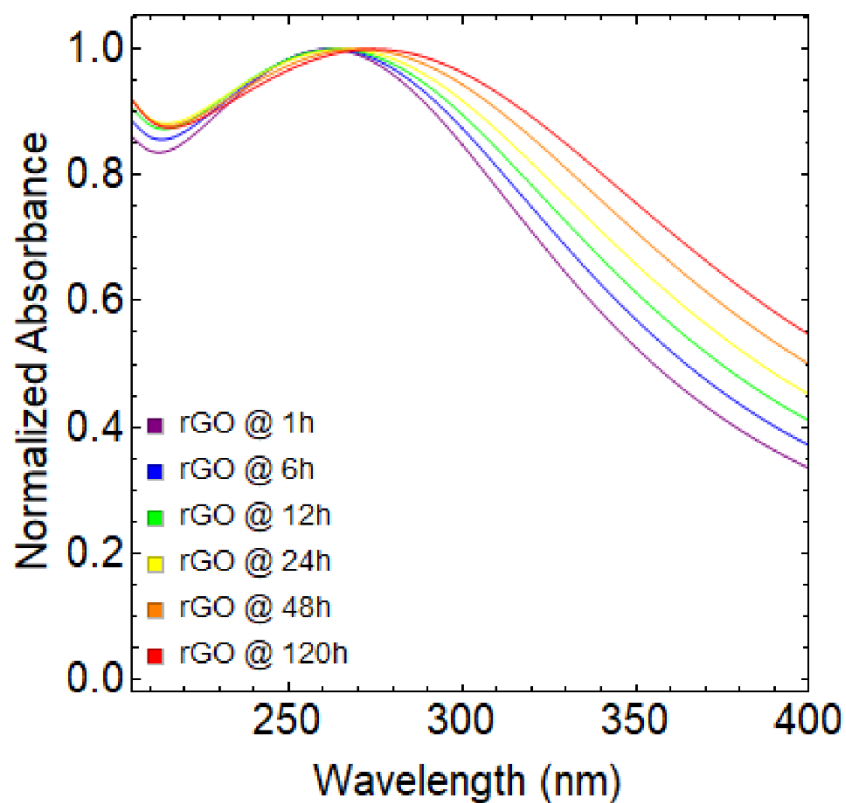

**Figure S5.** Absorbance spectra from 200 to 400 nm of rGO reduced at 80 °C and considering different reduction times.

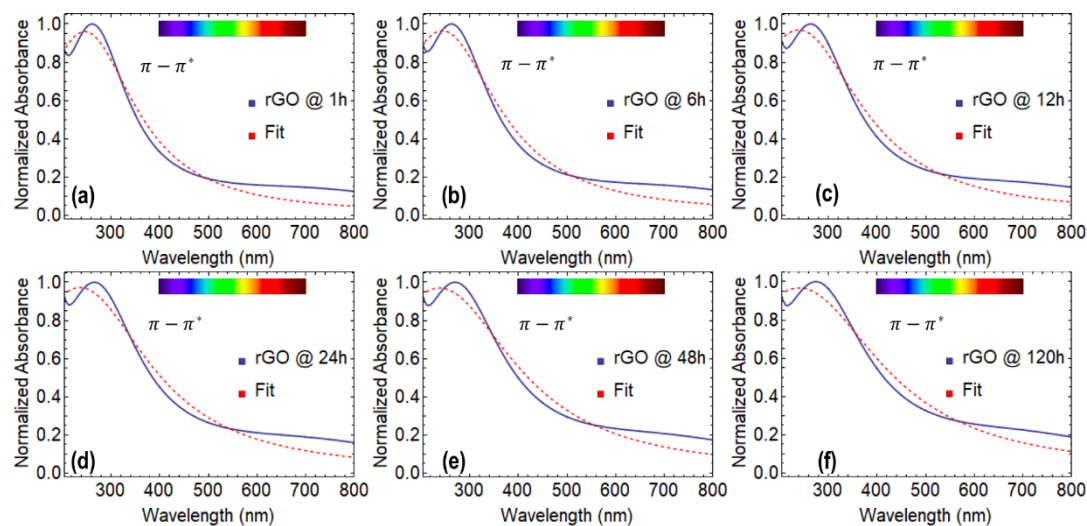

**Figure S6.** Absorbance spectrum of rGO reduced at 80 °C considering different reduction times: (a) 0h, (b) 6h, (c) 12 h, (d) 24h, (e) 48, and (f) 120h.

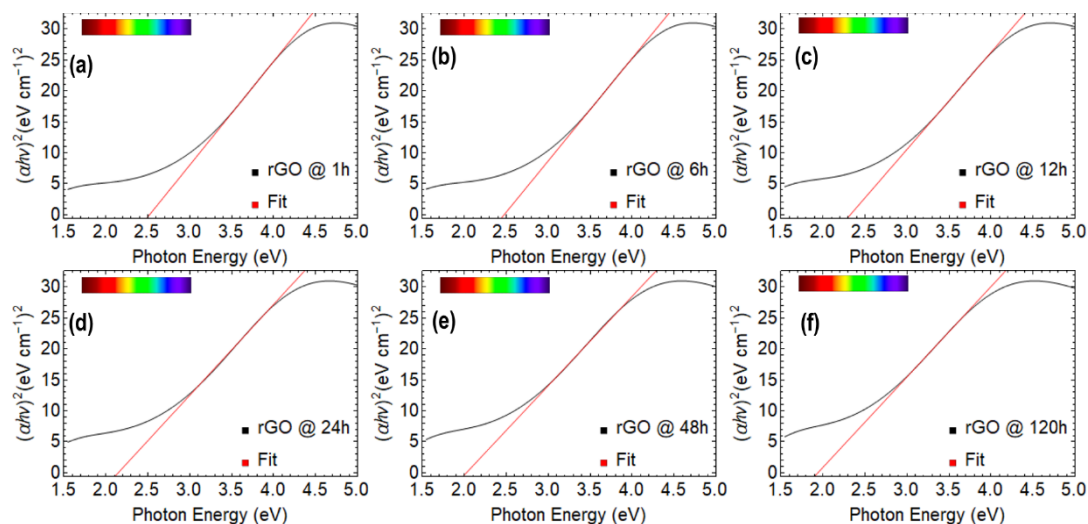

**Figure S7.** Tauc plot of rGO reduced at 80 °C considering different reduction times: (a) 0h, (b) 6h, (c) 12 h, (d) 24h, (e) 48, and (f) 120h.

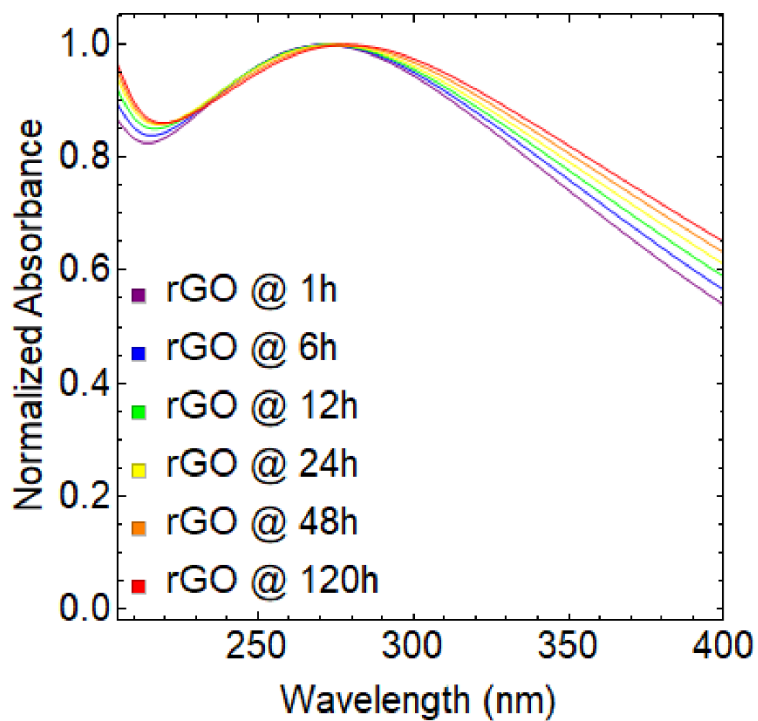

**Figure S8.** Absorbance spectra from 200 to 400 nm of rGO reduced at 50 °C and considering different reduction times.

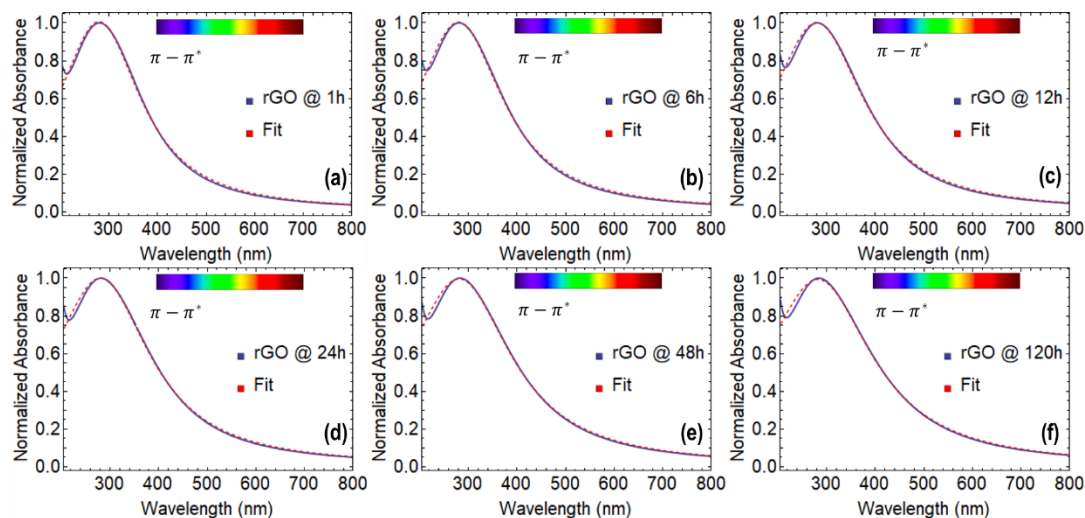

**Figure S9.** Absorbance spectrum of rGO reduced at 50 °C considering different reduction times:

(a) 0h, (b) 6h, (c) 12 h, (d) 24h, (e) 48, and (f) 120h.

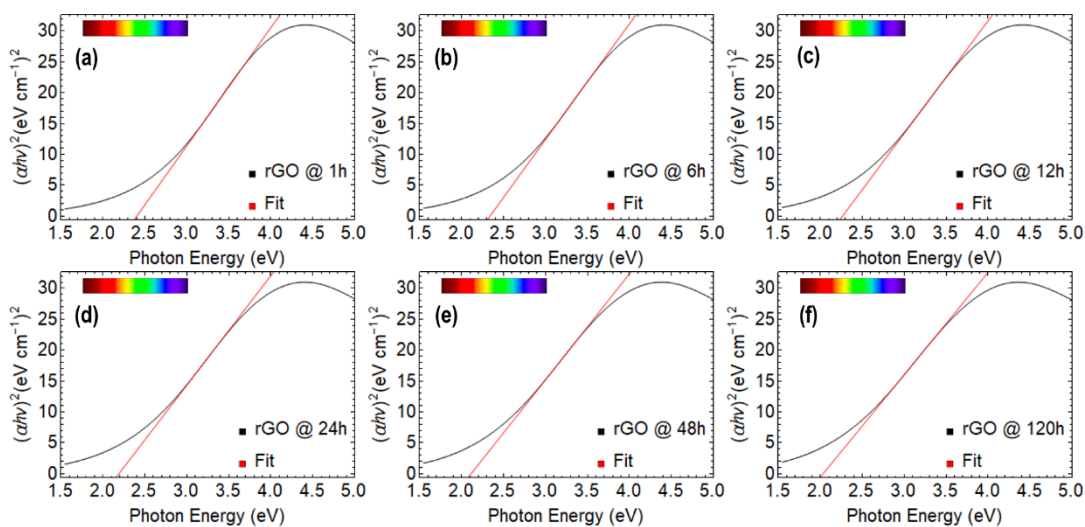

**Figure S10.** Tauc plot of rGO reduced at 50 °C considering different reduction times: (a) 0h, (b)

6h, (c) 12 h, (d) 24h, (e) 48, and (f) 120h

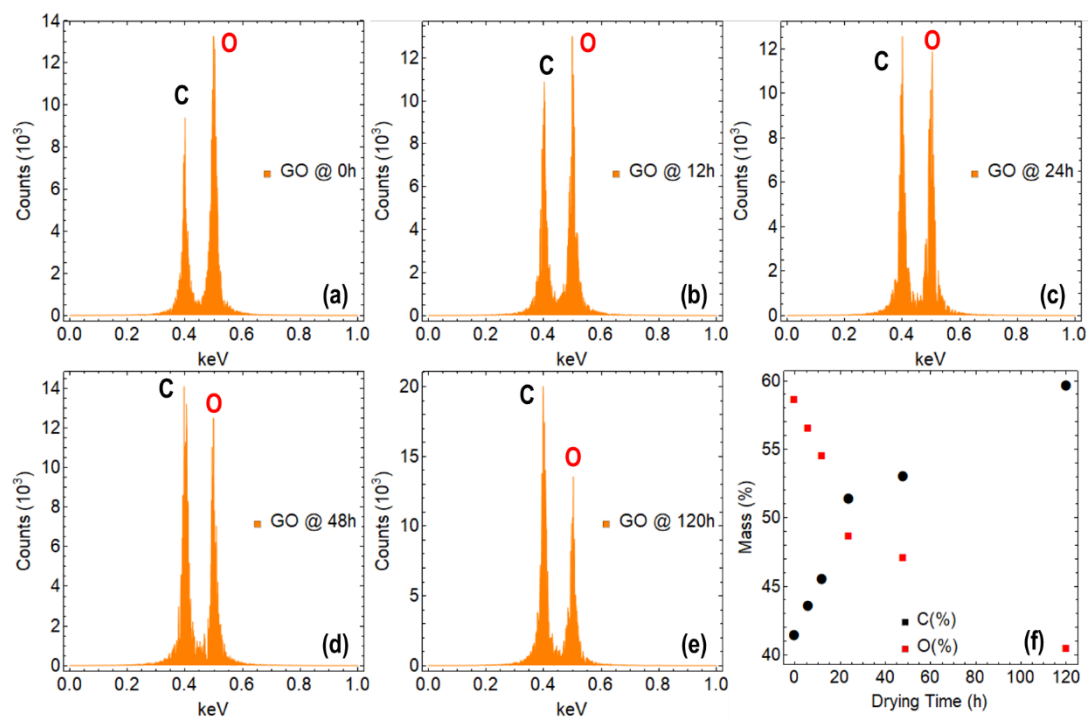

**Figure S11.** EDS measurements of GO dried at 80 °C considering different drying times: (a) 0h, (b) 12 h, (c) 24h, (d) 48, and (e) 120h. (f) Variation of the elemental composition as a function of drying time.



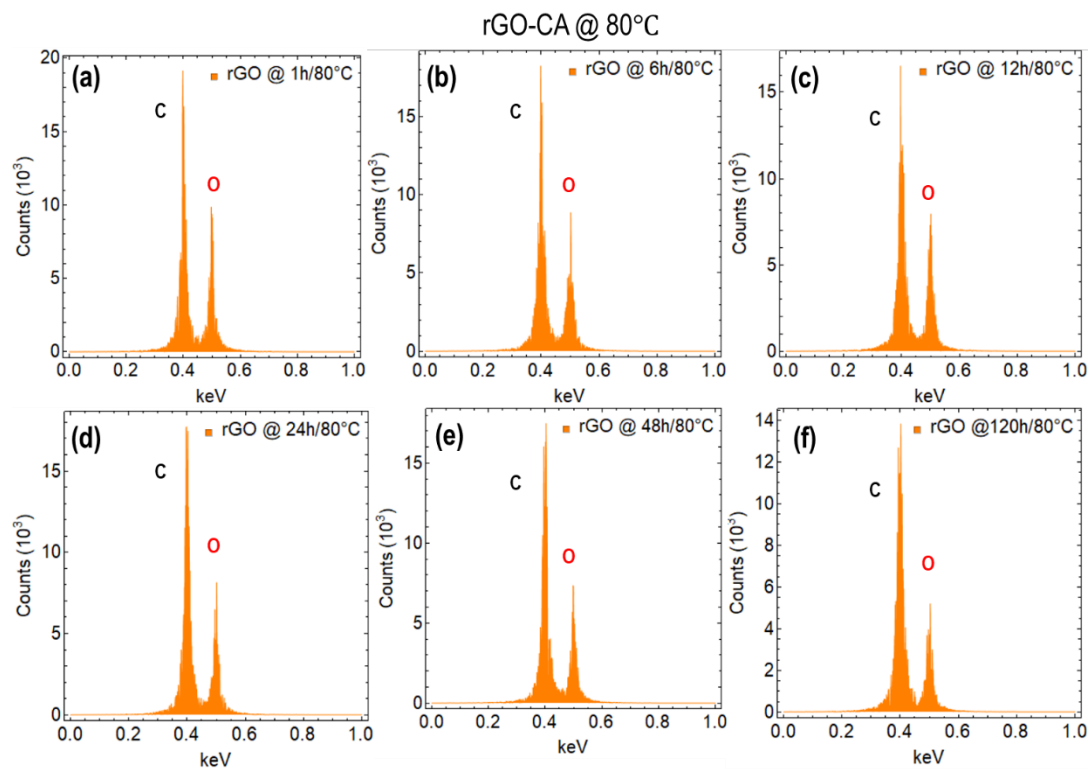

**Figure S12.** EDS measurements of rGO reduced at 80 °C considering different reduction times:

(a) 0h, (b) 6h, (c) 12 h, (d) 24h, (e) 48, and (f) 120h.

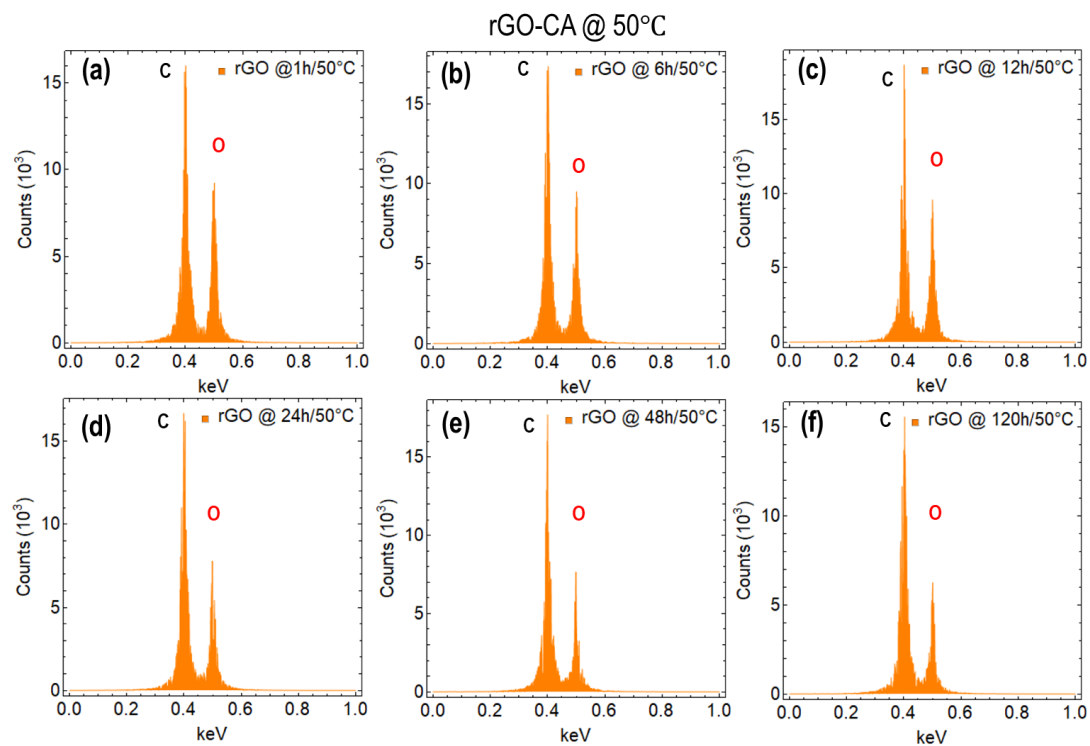

**Figure S13.** EDS measurements of rGO reduced at 50 °C considering different reduction times:

(a) 0h, (b) 6h, (c) 12 h, (d) 24h, (e) 48, and (f) 120h.

**Table S1.** Peak Position of  $\pi - \pi^*$  and  $n - \pi^*$  transitions in GO dried at 80 °C and related full width at half maximums (FWHM), considering different drying times.

| Drying Time<br>(h) | $\pi - \pi^*$ Transition<br>(nm) | $n - \pi^*$ Transition<br>(nm) | FWHM<br>(nm) | R <sup>2</sup> |
|--------------------|----------------------------------|--------------------------------|--------------|----------------|
| 0                  | 229.63                           | 305.15                         | 126.57       | 0.982          |
| 6                  | 230.59                           | 305.15                         | 163.92       | 0.987          |
| 12                 | 231.51                           | 305.16                         | 215.92       | 0.992          |
| 24                 | 233.23                           | 305.17                         | 261.59       | 0.994          |
| 48                 | 238.23                           | 305.19                         | 301.72       | 0.995          |
| 120                | 243.81                           | 305.27                         | 343.90       | 0.996          |

**Table S2.** Estimated optical bandgap values of GO dried at 80 °C as a function of drying time.

| Drying Time (h) | Optical Bandgap (eV) | R <sup>2</sup> |
|-----------------|----------------------|----------------|
| 0               | 4.09                 | 0.996          |
| 6               | 3.82                 | 0.996          |
| 12              | 3.48                 | 0.998          |
| 24              | 3.18                 | 0.998          |
| 48              | 2.94                 | 0.998          |
| 120             | 2.76                 | 0.999          |

**Table S3.** Optical absorption coefficient of GO dried at 80 °C estimated by a linear fit of the optical absorbance over cell length as a function of concentration under three drying times.

| Material   | Absorption coefficient (ml mg <sup>-1</sup> m <sup>-1</sup> ) | R <sup>2</sup> |
|------------|---------------------------------------------------------------|----------------|
| GO @ 0 h   | 3932.22                                                       | 0.992          |
| GO @ 48 h  | 4586.71                                                       | 0.992          |
| GO @ 120 h | 5507.15                                                       | 0.985          |

**Table S4.** Peak Position of the  $\pi - \pi^*$  transition in rGO reduced at 80 °C and related full width at half maximums (FWHM), considering different reduction times.

| <b>Drying Time</b> | <b><math>\pi - \pi^*</math> Transition</b> | <b>FWHM</b> | <b>R<sup>2</sup></b> |
|--------------------|--------------------------------------------|-------------|----------------------|
| <b>(h)</b>         | <b>(nm)</b>                                | <b>(nm)</b> |                      |
| 1                  | 261.73                                     | 271.57      | 0.988                |
| 6                  | 262.75                                     | 278.39      | 0.988                |
| 12                 | 263.77                                     | 311.28      | 0.989                |
| 24                 | 265.81                                     | 344.24      | 0.990                |
| 48                 | 269.89                                     | 375.28      | 0.990                |
| 120                | 273.94                                     | 406.23      | 0.991                |

**Table S5.** Peak Position of the  $\pi - \pi^*$  transition in rGO reduced at 50 °C and related full width at half maximums (FWHM), considering different reduction times.

| <b>Drying Time</b> | <b><math>\pi - \pi^*</math> Transition</b> | <b>FWHM</b> | <b>R<sup>2</sup></b> |
|--------------------|--------------------------------------------|-------------|----------------------|
| <b>(h)</b>         | <b>(nm)</b>                                | <b>(nm)</b> |                      |
| 1                  | 260.33                                     | 208.94      | 0.999                |
| 6                  | 260.78                                     | 221.31      | 0.999                |
| 12                 | 261.56                                     | 234.23      | 0.999                |
| 24                 | 263.12                                     | 247.03      | 0.999                |
| 48                 | 266.24                                     | 259.03      | 0.999                |
| 120                | 269.36                                     | 271.41      | 0.999                |

**Table S6.** Elemental composition of graphite and GO dried at 80 °C, considering different drying times.

| Sample     | C (%) | O (%) |
|------------|-------|-------|
| Graphite   | 99.61 | ---   |
| GO @ 0 h   | 41.47 | 58.53 |
| GO @ 6 h   | 43.75 | 56.25 |
| GO @ 12 h  | 45.56 | 54.44 |
| GO @ 24 h  | 51.42 | 48.58 |
| GO @ 48 h  | 53.01 | 46.99 |
| GO @ 120 h | 59.65 | 40.35 |

**Table S7.** Elemental composition of rGO reduced at 80 °C, considering different reduction times.

| Sample      | C (%) | O (%) |
|-------------|-------|-------|
| rGO @ 1 h   | 65.99 | 34.01 |
| rGO @ 6 h   | 67.28 | 32.72 |
| rGO @ 12 h  | 67.52 | 32.48 |
| rGO @ 24 h  | 68.53 | 31.47 |
| rGO @ 48 h  | 70.44 | 29.56 |
| rGO @ 120 h | 72.68 | 27.32 |

**Table S8.** Elemental composition of rGO reduced at 50 °C, considering different reduction times.

| Sample      | C (%) | O (%) |
|-------------|-------|-------|
| rGO @ 1 h   | 63.42 | 36.58 |
| rGO @ 6 h   | 64.59 | 35.41 |
| rGO @ 12 h  | 66.06 | 33.94 |
| rGO @ 24 h  | 68.17 | 31.83 |
| rGO @ 48 h  | 69.83 | 30.17 |
| rGO @ 120 h | 71.33 | 28.67 |
